# Supplementary material for: SILAR-Deposited CuO Nanostructured Films Doped with Zinc and Sodium for Improved CO2 Gas Detection
Source: MDPI journal article supplement (doi:10.3390/nano13202793), 2023-10-19
Supplement: s1 [file s1]

## Supplementary data

# SILAR-Deposited CuO Nanostructured Films Doped with Zinc and Sodium for Improved CO<sub>2</sub> Gas Detection

Rana Saad<sup>1</sup>, Ashour M. Ahmed<sup>1,2</sup>, Khaled Abdelkarem<sup>1</sup>, Mohamed Zayed<sup>1</sup>, Zainab M. Faidey<sup>1</sup>, Ghadah M. Al-Senani<sup>3</sup>, Mohamed Shaban<sup>4\*</sup>, Mohamed T. Tammam<sup>1</sup>, Hany Hamdy<sup>1</sup>

<sup>1</sup> Nanophotonics and Applications (NPA) Lab, Physics Department, Faculty of Science, Beni-Suef University, Beni-Suef 62514, Egypt

<sup>2</sup> Physics Department, College of Science, Imam Mohammad Ibn Saud Islamic University (IMSIU), Riyadh 11623, Saudi Arabia

<sup>3</sup> Department of Chemistry, College of Science, Princess Nourah bint Abdulrahman University, P.O. Box 84428, Riyadh 11671, Saudi Arabia

<sup>4</sup> Department of Physics, Faculty of Science, Islamic University of Madinah, P.O. Box 170, Madinah 42351, Saudi Arabia

\* Correspondence: mssfadel@aucegypt.edu

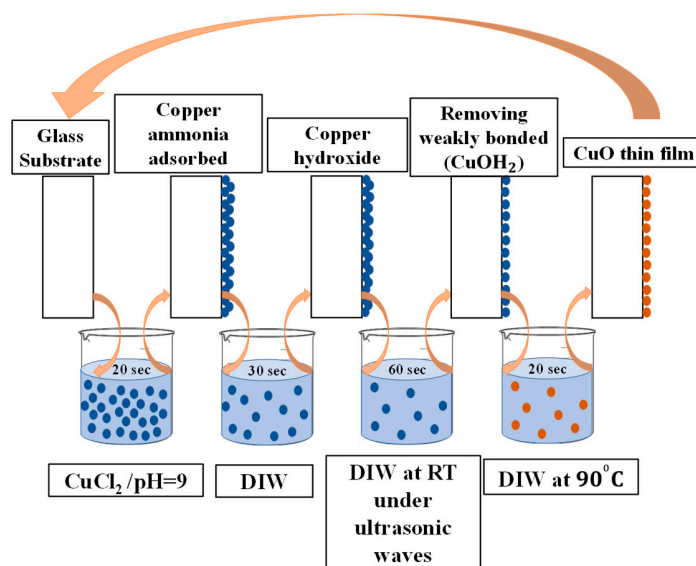

**Figure S1.** Schematic representation of the used modified SILAR technique to produce pure and doped CuO films.

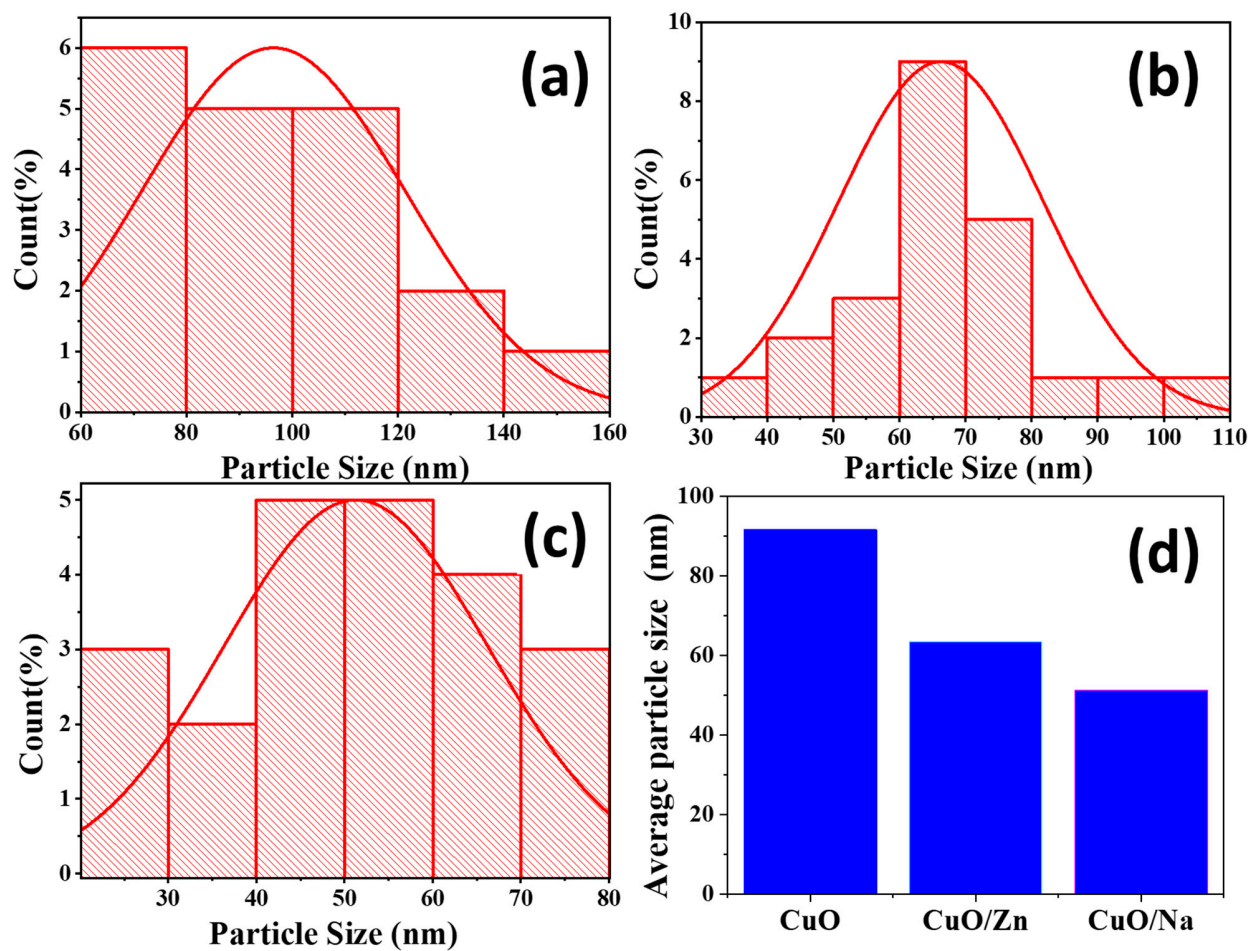

**Figure S2.** The particle size histogram for (a) CuO, (b) CuO/Zn, and (c) CuO/Na films.

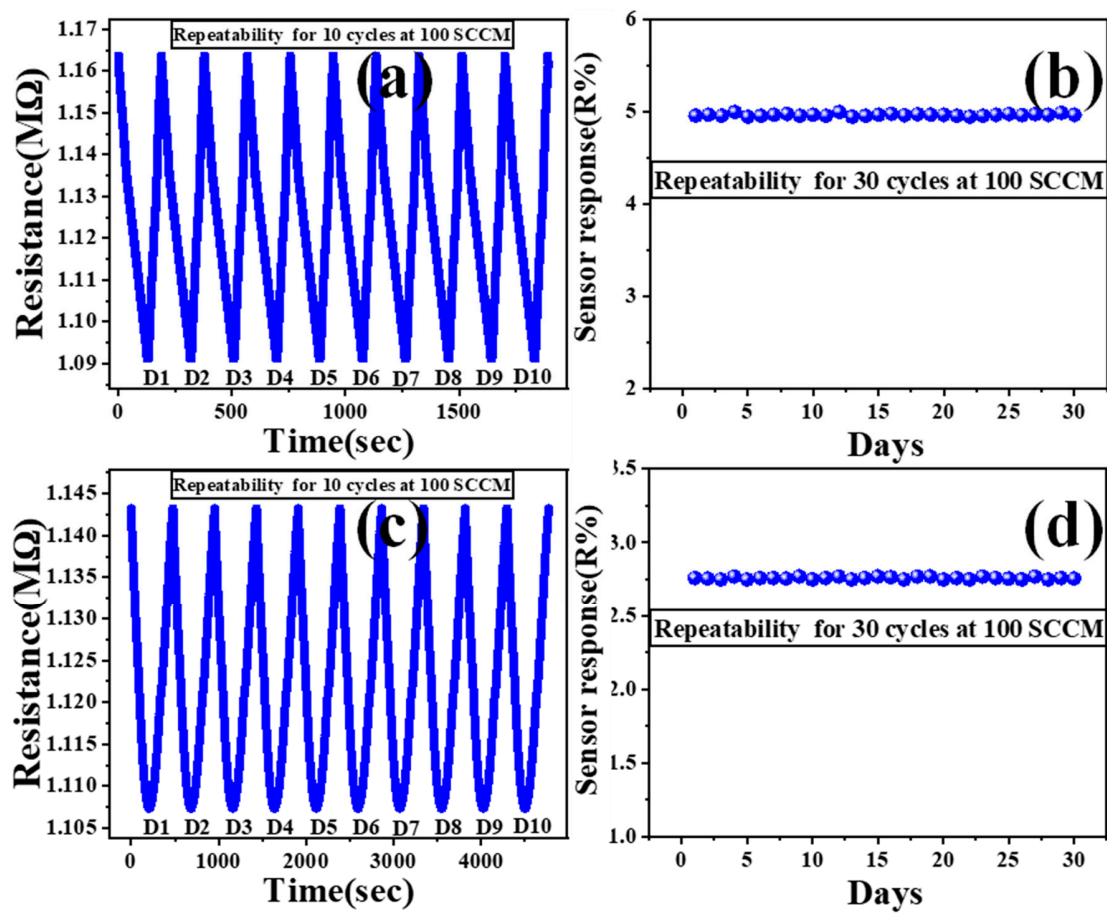

**Figure S3.** The repeatability of the CuO/Na when exposed to 100 SCCM flow rate of (a,b) CH<sub>3</sub>OH and (c,d) NH<sub>3</sub> at room temperature in terms of (a,c) sensor resistance and (b,d) sensor response (R%).

**Table S1.** The oxidation state, ionic radius, and electronegativity for Cu, Zn, and Na.

|    | Oxidation state | Ionic radius                | Electronegativity |
|----|-----------------|-----------------------------|-------------------|
| Cu | + 2             | Cu <sup>2+</sup> (0.072 nm) | 1.90              |
| Zn | + 2             | Zn <sup>2+</sup> (0.074 nm) | 1.65              |
| Na | + 1             | Na <sup>+</sup> (0.102 nm)  | 0.93              |
